# Overexpression of RAD51B predicts a preferable prognosis for non-small cell lung cancer patients

Mengyin Wu<sup>1,\*</sup>, Zufeng Sheng<sup>1</sup>, Lingyan Jiang<sup>1</sup>, Zhengyuan Liu<sup>1</sup>, Yuhua Bi<sup>1</sup> and Yueping Shen<sup>1,\*</sup>

<sup>1</sup>Department of Epidemiology and Biostatistics, School of Public Health, Medical College, Soochow University, Suzhou, China

\*These authors have contributed equally to this work

Correspondence to: Yueping Shen, email: shenyueping@suda.edu.cn

Keywords: RAD51B, non-small-cell lung cancer, homologous recombination repair, TCGA, prognosis

Received: March 21, 2017

Accepted: July 18, 2017

Published: September 06, 2017

Copyright: Wu et al. This is an open-access article distributed under the terms of the Creative Commons Attribution License 3.0 (CC BY 3.0), which permits unrestricted use, distribution, and reproduction in any medium, provided the original author and source are credited.

## ABSTRACT

**Lung cancer is the leading cause of cancer-related death. The majority of patients are diagnosed at an incurable advanced stage with poor prognosis. A recent study associated the methylation of homologous recombination genes with expression of immune checkpoints in lung squamous cell carcinoma. However, the correlation between them remains unclear. In our study, we propose that RAD51B, a repair gene in the homologous recombination process, which is noticed to be a key player in the maintenance of chromosome integrity and in sensing DNA damage, can act as an independent factor affecting the prognosis of non-small-cell lung cancer (NSCLC). Univariate analysis showed that overexpression of RAD51B is statistically significant correlated with better prognosis ( $P=0.013$ ). Further, the multivariate Cox regression analysis showed that the morbidity of patients with high expression of RAD51B was decreased by 26% compared to those with low expression (HR=0.74, 95%CI: 0.59-0.93), especially for the patients with squamous cell carcinoma (HR=0.68, 95%CI: 0.51-0.90). In conclusion, RAD51B in mRNA level can be an important indicator to decide the prognosis of NSCLC and its overexpression predicts a preferable prognosis for NSCLC. Our results serve as a foundation for the investigation of the role of RAD51B in NSCLC, which may lead to potential therapeutic innovations.**

## INTRODUCTION

Lung cancer remains the most frequently diagnosed cancer worldwide and the leading cause of cancer-related deaths. Over half of patients die within one year after being diagnosed with lung cancer and the 5-year survival rate is only about 17.8% [1]. Therein, non-small-cell lung carcinoma (NSCLC) accounts for approximately 85% of all these cases. Due to its characteristics of high recurrence and metastasis after surgery, the clinical prognosis is unfavorable, particular if diagnosed at a later stage. Hence, finding significant, early-presented, prognosis factors of NSCLC can aid prompt treatment. However, the clinical prognosis factors currently available only exhibit in a small fraction of NSCLC deaths. Like PD-1 inhibitor, as

a powerful drug to unleash the immune system, which used to hold the promise of wiping out cancer for some people with advanced lung cancer, but two recent studies suggest that it might backfire in some patients - speeding cancer's spread [2, 3]. Therefore, there is a need to explore new biomarkers that correlate with morbidity of NSCLC patients. Furthermore, targetable mutations and targeted therapy resistance development in 50% of NSCLC cases emphasizes the significance for developing new prognostic indicators and alternative therapeutic strategies for treating NSCLC [4].

The accumulation of progressive damage to nuclear DNA is considered to be a prominent factor in age-associated diseases [5]. Notably, DNA double-strand breaks (DSBs) are particularly detrimental which

can result in mutations and chromosomal translocations and may induce cancer [6]. Therefore, they must be efficiently repaired to preserve genome integrity and functionality. One of the major repair pathways is homologous recombination, which works as an error-free mechanism by employing the homologous sequence in the sister chromatid as a template to prime repair synthesis and restore chromosome integrity [7]. The defining step of homologous strand exchange is directed by the RAD51 protein [8]. It forms a nucleoprotein filament by polymerizing onto resected DNA ends to promote this exchange process [9]. Previous researches have shown that the aberration of its expression has significant effects on tumorigenesis and tumor progression.

It has also been suggested that RAD51 homologues (RAD51B, RAD51C, RAD51D, XRCC2, and XRCC3) are important cofactors for RAD51 protein in the process of chain transfer or chain interaction to initiate DNA homologous pairing [10]. They share 20-30% DNA sequence, and have been identified in vertebrates, with animal cells defective in any of these showing spontaneous chromosomal aberrations [11]. In addition to their independent functions, they were observed to form two major complexes: one defined as BCDX2 is made of RAD51B, RAD51C, RAD51D and XRCC2, whereas the other named CX3 consists of RAD51C and XRCC3. In addition, RAD51B-RAD51C (BC) and RAD51D-XRCC2 (DX2) sub-complexes are formed, which act at both early and late stages of the homologous recombination repair process [12]. Notably, the sub-complex BC exhibits single-stranded DNA-dependent ATPase activity involving RAD51 foci formation and reacting to DNA damage, suggesting an early function in the invasion step of homologous recombination [13]. However, previous research mainly revealed the functions performed by RAD51C, the specific activities of RAD51B have not been clarified *in vivo*. Recent reports demonstrated that haploinsufficiency of RAD51B could cause a defect in homologous recombination repair as well as centrosome fragmentation and increased aneuploidy in HCT116 [14]. Moreover, overexpression of RAD51B has been observed to cause cell cycle G1 delay and cell apoptosis, which suggests a significant role in the maintenance of chromosome integrity and in sensing DNA damage [15]. Furthermore, RAD51B gene has been identified as a risk factor for prostate, ovarian, breast, head and neck and other cancer types in recent reports [16–18]. However, no prior research has proposed a link between the expression of RAD51B gene and lung cancer. Also, the study of the RAD51 family still remains poorly understood. Hence, we hypothesize that RAD51 homologues may have a positive correlation with lung cancer prognosis.

In order to verify this hypothesis, we exploited the largest cancer gene information database worldwide, The Cancer Genome Atlas database (TCGA), to screen related genes in mRNA level using Statistical Product and Service

Solutions (SPSS23.0) to perform statistical analysis. In our study, we describe a significant result from data analysis, proposing for the first time the function of RAD51B in the prognosis of non-small-cell lung carcinoma patients. Herein, we show that RAD51B overexpression could indicate an increase in the overall survival rate of NSCLC patients, which suggests that RAD51B could act as a new potential biomarker and a predictor of better prognosis of NSCLC patients.

## RESULTS

At the beginning, we analyzed the relationship between the prognosis of NSCLC and RAD51 family mRNA levels that are available from the TCGA database, including RAD51B, RAD51C, RAD51D, XRCC2, and XRCC3, however, no significant correlation was found except for RAD51B (data not shown). Hence, our analysis focuses on RAD51B associated with NSCLC in mRNA level, as follows.

### RAD51B expression level comparison of clinicopathological parameters

In Table 1, we found that there was a higher expression level of RAD51B in NSCLC patients with male, squamous cell carcinoma, EGFR mutation, and no KRAS mutation than the reference groups (all  $P < 0.05$ ). However, no significant difference for the expression level of RAD51B was found for age, recurrence, history of smoking, stage and survival outcomes (all  $P > 0.05$ ).

### Correlations between clinicopathological parameters and survival time in NSCLC patients

Table 2 describes the OS for 1-year, 2-year and 5-year, the median time with 95%CI, and compares the differences of the survival curves with clinicopathological parameters. In 1062 NSCLC cases, 1-year, 2-year and 5-year OS (95% CI) were 84.24% (81.83%~86.65%), 70.58% (67.25%~73.91%) and 41.63% (36.77%~46.44%), respectively.

It was found that the increasing OS in NSCLC patients was predominantly associated with younger age ( $P = 0.019$ ), no recurrence ( $P < 0.001$ ), and earlier UICC stage ( $P < 0.001$ ), whereas this increase is not correlated with patients' gender, history of smoking, or pathological type (Table 2).

For the total patients, we found that patients with high RAD51B expression have a longer median survival time than those with low RAD51B expression ( $P = 0.013$ , Figure 1A). After stratification analysis, RAD51B overexpression was also found to be associated with the increasing OS in the patients with squamous cell carcinoma ( $P = 0.0076$ , Figure 1B), but this association

**Table 1: RAD51B expression level comparison of clinicopathological parameters**

| Clinicopathological parameters       | RAD51B expression level |          |                   |          |      |      | $\chi^2/z$ value | P Value          |
|--------------------------------------|-------------------------|----------|-------------------|----------|------|------|------------------|------------------|
|                                      | n                       | $P_{25}$ | $P_{50}$ (median) | $P_{75}$ | Max  | Min  |                  |                  |
| Gender                               |                         |          |                   |          |      |      |                  |                  |
| Male                                 | 635                     | 5.59     | 6.05              | 6.60     | 9.31 | 3.54 | 2.661            | <b>0.008</b>     |
| Female                               | 427                     | 5.56     | 5.96              | 6.38     | 9.87 | 3.54 |                  |                  |
| Age                                  |                         |          |                   |          |      |      |                  |                  |
| ≤68                                  | 577                     | 5.58     | 6.00              | 6.54     | 9.87 | 3.56 | 0.931            | 0.352            |
| >68                                  | 485                     | 5.58     | 5.99              | 6.46     | 9.31 | 3.54 |                  |                  |
| Recurrence                           |                         |          |                   |          |      |      |                  |                  |
| Yes                                  | 195                     | 5.62     | 6.09              | 6.55     | 8.39 | 3.54 | 1.806            | 0.071            |
| No                                   | 556                     | 5.53     | 5.93              | 6.42     | 9.87 | 3.75 |                  |                  |
| *Missing                             | 311                     |          |                   |          |      |      |                  |                  |
| History of smoking                   |                         |          |                   |          |      |      |                  |                  |
| Non-smoker                           | 93                      | 5.60     | 6.06              | 6.45     | 8.61 | 4.25 | 1.161            | 0.560            |
| Reformed smoker                      | 678                     | 5.59     | 5.99              | 6.54     | 9.31 | 3.54 |                  |                  |
| Current smoker                       | 264                     | 5.50     | 5.99              | 6.45     | 9.87 | 3.56 |                  |                  |
| Missing                              | 27                      |          |                   |          |      |      |                  |                  |
| Stage                                |                         |          |                   |          |      |      |                  |                  |
| Stage I                              | 547                     | 5.59     | 5.97              | 6.46     | 9.31 | 3.54 | 1.687            | 0.430            |
| Stage II                             | 294                     | 5.52     | 6.01              | 6.50     | 9.87 | 3.56 |                  |                  |
| Stage III-IV                         | 216                     | 5.65     | 6.06              | 6.61     | 8.14 | 3.54 |                  |                  |
| Missing                              | 5                       |          |                   |          |      |      |                  |                  |
| Pathological type                    |                         |          |                   |          |      |      |                  |                  |
| Adenocarcinoma <sup>#</sup>          | 503                     | 5.49     | 5.90              | 6.30     | 9.87 | 3.54 | 41.040           | <b>&lt;0.001</b> |
| Squamous cell carcinoma <sup>%</sup> | 520                     | 5.68     | 6.17              | 6.70     | 9.31 | 3.56 |                  |                  |
| Others <sup>&amp;</sup>              | 39                      | 5.48     | 5.81              | 6.25     | 4.61 | 7.68 |                  |                  |
| EGFR mutation                        |                         |          |                   |          |      |      |                  |                  |
| No                                   | 219                     | 5.56     | 5.91              | 6.32     | 8.39 | 3.54 | 3.700            | <b>&lt;0.001</b> |
| Yes                                  | 38                      | 5.88     | 6.37              | 6.84     | 7.98 | 4.89 |                  |                  |
| Missing                              | 805                     |          |                   |          |      |      |                  |                  |
| KRAS mutation                        |                         |          |                   |          |      |      |                  |                  |
| No                                   | 183                     | 5.68     | 6.09              | 6.46     | 8.39 | 3.54 | 2.443            | <b>0.015</b>     |
| Yes                                  | 74                      | 5.45     | 5.83              | 6.13     | 7.68 | 3.77 |                  |                  |
| Missing                              | 805                     |          |                   |          |      |      |                  |                  |
| Outcome                              |                         |          |                   |          |      |      |                  |                  |
| Living                               | 688                     | 5.55     | 5.99              | 6.49     | 9.87 | 3.54 | 0.150            | 0.881            |
| Death                                | 374                     | 5.63     | 6.01              | 6.48     | 8.39 | 3.54 |                  |                  |

<sup>#</sup> Adenocarcinoma: lung acinar adenocarcinoma, lung adenocarcinoma mixed subtype, lung adenocarcinoma-not otherwise specified (NOS), lung clear cell adenocarcinoma, lung micro papillary adenocarcinoma, lung mucinous adenocarcinoma, lung papillary adenocarcinoma, lung signet ring adenocarcinoma, lung solid pattern predominant adenocarcinoma.

<sup>%</sup> squamous cell carcinoma: lung basaloid squamous cell carcinoma, lung clear cell squamous cell carcinoma, lung papillary squamous cell carcinoma, lung small cell squamous cell carcinoma, lung squamous cell carcinoma-not otherwise specified (NOS).

<sup>&</sup>Others: lung bronchiole-alveolar carcinoma mucinous, lung bronchiole-alveolar carcinoma nonmucinous, mucinous (colloid) carcinoma.

was not shown in the adenocarcinoma patients ( $P=0.6244$ , Figure 1C).

### Cox model analysis for the expression of RAD51B and RAD51B's independent prediction of prognosis in NSCLC patients

According to Table 3, the multivariate Cox analysis for the total patients demonstrates that overexpression of RAD51B is independently associated with better prognosis for NSCLC patients. The HR for death of patients was 0.74 (95%CI: 0.59~0.93) after adjustment for the potential factors (recurrence, stage, age, gender and history of smoking). In addition, elder age, later UICC stage, and recurrence were significantly associated with the increasing death risk of death for NSCLC patients. In the stratified analysis (Table 4 and Table 5), overexpression of RAD51B was prominently associated with the decreasing death risk of death for patients with squamous cell carcinoma (HR=0.68, 95%CI: 0.51~0.90). However, a significantly better prognosis effect for RAD51B was not found in NSCLC patients with adenocarcinoma (HR=0.78, 95%CI: 0.53~1.16).

## DISCUSSION

The function of RAD51B in cancer cell lines has not been well studied and most previous work has rarely mentioned the association between RAD51B and lung cancer. Herein, we took advantage of TCGA data, screening candidate DNA-repair genes (RAD51B, RAD51C, RAD51D, XRCC2, and XRCC3) with covariance and correlation matrices in mRNA level from complete 1124 complete cases of non-small cell lung cancer clinical data. The Kaplan-Meier analysis results indicate that patients with low level of RAD51B expression exhibited about 6% overall survival rate decreasing compared to patients with high level ( $P=0.013$ ), whereas the remaining genes (RAD51C, RAD51D, XRCC2, and XRCC3) showed no statistical significance (data not shown). This result implies that RAD51B could be a candidate prognostic factor for NSCLC patients. Furthermore, after adjustment for some potential confounding factors, the multivariate Cox regression analysis showed that the death risk of patients with high expressions of RAD51B decreased by 26% compared to those with low expression, especially for NSCLC patients with squamous cell carcinoma. The distinct roles of RAD51B in lung squamous cell carcinoma and lung adenocarcinoma may be contributed to the presence of different signaling pathways or growth factors in these two histopathology types [19]. We are yet to unravel the mechanisms underlying this phenomenon, but the results suggest that RAD51B might be a novel marker, particularly useful for the NSCLC patients with squamous cell carcinoma.

Recently, a few researches have focused on a genetic level to study the association between RAD51B genetic variants and the risk of the male breast cancer in a GWAS study, and the association with death risk of glioblastoma in a case-control study [20, 21]. In accord with our findings, in terms of the epigenetic level, Rieke reported that hypermethylation of RAD51B was associated with an immune-evasive phenotype in squamous cell carcinoma in a recent publication [22], which indicates that DNA methylation-mediated decrease in RAD51B expression levels may predict a poorer prognosis because of activated immune evasion. Nevertheless, we point the effect out directly and our results, based on a population study, provide the first statistical support to RAD51B overexpression leading to an improved prognosis state for NSCLC patients. Furthermore, the finding of Osamu Date shows that haploinsufficiency of RAD51B leads to aberrant homologous recombination repair as well as centrosome fragmentation and increased aneuploidy in HCT116 cells, which indicates that loss of the proper biallelic expression of RAD51B is likely to be linked with malignant transformation by inducing chromosome instability [14]. Also, RAD51B has been shown to interact directly with P53, implying its function as a tumor suppressor [23]. In uterine leiomyoma, the phenomenon of frequent inactivation of RAD51B by translocation between chromosomes 12 and 14 was noticed, supporting a positive role of RAD51B in tumorigenesis [24].

Basic studies on the mechanism of RAD51B were also found to be in accord with our results. Emerging evidence suggests that the highly conserved *Saccharomyces cerevisiae* RAD51 recombinase plays a key role in eukaryotic, which coats ssDNA ends to assemble a nucleoprotein filament, promoting strand invasion into a homologous duplex to initiate repair synthesis [25, 26]. Moreover, RAD51B repairs various types of DNA lesions and maintains chromosome integrity by promoting the assembly of RAD51 nucleoprotein filaments during this process [27]. Notably, RAD51B has been demonstrated to express at its highest level widely in tissues that are vigorous in recombination work, and RAD51B<sup>-/-</sup>-knockout results in early embryonic lethality and fails to proliferate *in vitro*, which indicates that the RAD51B gene product is essential for cell development and homologous recombination activity [23]. In addition to the functions mentioned above, RAD51B is also proposed to participate in cell cycle control in a direct way. A recent report found that overexpression of the wild-type RAD51B protein of CHO cells containing a mutant P53 can induce G1 delay, which could cause senescence of normal cells but control the proliferation of cancer cells, indicating that hyperexpression of RAD51B may play a positive role in cancer prognosis [15]. In mechanism study, RAD51B protein was found to combine ssDNA and dsDNA in the presence of ATP and Mg<sup>2+</sup> or Mn<sup>2+</sup>

**Table 2: Correlations between clinicopathological parameters and survival time in NSCLC patients**

| Clinicopathological parameters   | Cases N | Overall survival (%) |        |        | Median survival time (days) and 95%CI | Chi-square value | P-value          |
|----------------------------------|---------|----------------------|--------|--------|---------------------------------------|------------------|------------------|
|                                  |         | 1-year               | 2-year | 5-year |                                       |                  |                  |
| Gender                           |         |                      |        |        |                                       |                  |                  |
| Male                             | 635     | 81.10                | 66.70  | 43.24  | 1423.0 (1194.0~1713.0)                | 1.544            | 0.214            |
| Female                           | 427     | 88.77                | 76.30  | 37.77  | 1379.0 (1161.0~1656.0)                |                  |                  |
| Age                              |         |                      |        |        |                                       |                  |                  |
| ≤68                              | 577     | 85.53                | 73.51  | 44.17  | 1485.0 (1344.0~1912.0)                | 5.480            | <b>0.019</b>     |
| >68                              | 485     | 82.45                | 67.33  | 38.74  | 1235.0 (1057.0~1622.0)                |                  |                  |
| Recurrence                       |         |                      |        |        |                                       |                  |                  |
| Yes                              | 195     | 88.07                | 63.78  | 28.19  | 999.0 (864.0~1235.0)                  | 35.215           | <b>&lt;0.001</b> |
| No                               | 556     | 87.09                | 78.87  | 57.22  | 2393.0 (n.r.*)                        |                  |                  |
| Missing*                         | 311     | -                    | -      | -      | -                                     |                  |                  |
| History of smoking               |         |                      |        |        |                                       |                  |                  |
| Non-smoker                       | 93      | 80.94                | 71.09  | 26.80  | 1073.0 (905.0~1498.0)                 | 1.019            | 0.601            |
| Reformed smoker                  | 678     | 85.64                | 72.19  | 44.02  | 1485.0 (1265.0~1856.0)                |                  |                  |
| Current smoker                   | 264     | 81.01                | 66.37  | 38.86  | 1293.0 (1043.0~1713.0)                |                  |                  |
| Missing                          | 27      | -                    | -      | -      | -                                     |                  |                  |
| Stage                            |         |                      |        |        |                                       |                  |                  |
| Stage I                          | 547     | 89.77                | 80.10  | 52.07  | 1912.0 (1656.0~2174.0)                | 51.810           | <b>&lt;0.001</b> |
| Stage II                         | 294     | 82.15                | 66.37  | 35.66  | 1147.0 (995.0~1492.0)                 |                  |                  |
| Stage III-IV                     | 216     | 72.20                | 52.50  | 23.51  | 807.0 (624.0~1045.0)                  |                  |                  |
| Missing                          | 5       | -                    | -      | -      | -                                     |                  |                  |
| Pathological type                |         |                      |        |        |                                       |                  |                  |
| Adenocarcinoma                   | 503     | 87.90                | 73.55  | 35.60  | 1293.0 (1194.0~1498.0)                | 1.800            | 0.180            |
| Squamous cell carcinoma          | 520     | 80.32                | 67.13  | 44.35  | 1470.0 (1150.0~1874.0)                |                  |                  |
| Others                           | 39      | -                    | -      | -      | -                                     |                  |                  |
| RAD51B (total)                   |         |                      |        |        |                                       |                  |                  |
| Lower                            | 758     | 83.12                | 68.95  | 37.76  | 1288.0 (1417.0~1470.0)                | 6.148            | <b>0.013</b>     |
| Higher                           | 304     | 86.85                | 74.39  | 49.30  | 1790.0 (1346.0~2133.0)                |                  |                  |
| RAD51B (Adenocarcinoma)          |         |                      |        |        |                                       |                  |                  |
| Lower                            | 402     | 86.89                | 73.00  | 33.43  | 1288.0 (1135.0~1498.0)                | 0.240            | 0.6244           |
| Higher                           | 101     | 91.49                | 71.16  | 31.68  | 1265.0 (879.0~1790.0)                 |                  |                  |
| RAD51B (Squamous cell carcinoma) |         |                      |        |        |                                       |                  |                  |
| Lower                            | 324     | 77.97                | 63.10  | 38.02  | 1154.0 (974.0~1640.0)                 |                  |                  |
| Higher                           | 196     | 83.62                | 72.85  | 52.63  | 1933.0 (1346.0~2803.0)                | 7.120            | <b>0.0076</b>    |
| Total                            | 1062    | 84.24                | 70.58  | 41.63  | 1379.0 (1235.0~1640.0)                |                  |                  |

n.r.\*=not reached.

**Table 3: Cox model survival analysis of clinicopathological parameters in NSCLC patients (n=1062)**

| Clinicopathological parameters | HR (95%CI)       |
|--------------------------------|------------------|
| RAD51B                         |                  |
| Lower                          | 1.00 (ref)       |
| Higher                         | 0.74 (0.59~0.93) |
| Gender                         |                  |
| Female                         | 1.00 (ref)       |
| Male                           | 0.88 (0.70~1.09) |
| Age (yrs)                      |                  |
| ≤68                            | 1.00 (ref)       |
| >68                            | 1.32 (1.07~1.63) |
| Recurrence                     |                  |
| No                             | 1.00 (ref)       |
| Yes                            | 2.01 (1.56~2.59) |
| Missing                        | 1.70 (1.32~2.18) |
| Smoke history                  |                  |
| Non-smoker                     | 1.00 (ref)       |
| Reformed-smoker                | 0.85 (0.56~1.29) |
| Current-smoker                 | 0.90 (0.58~1.41) |
| Missing                        | 0.79 (0.43~1.48) |
| Stage                          |                  |
| I                              | 1.00 (ref)       |
| II                             | 1.52 (1.18~1.95) |
| III+IV                         | 2.34 (1.83~3.00) |
| Missing                        | n.r.*            |

n.r.\*=not reached.

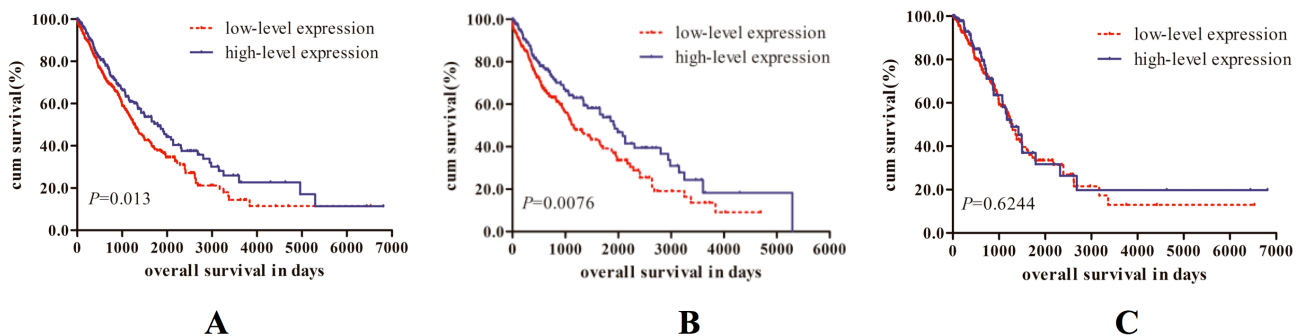

**Figure 1: Kaplan-Meier survival curves for patients with high or low level of RAD51B expression in NSCLC. (A) total patients (n=1062); (B) squamous cell carcinoma patients (n=520); (C) adenocarcinoma patients (n=503). The P-values were computed by log-rank test.**

**Table 4: Cox model survival analysis of clinicopathological parameters in NSCLC patients with squamous cell carcinoma (n=520)**

| Clinicopathological parameters | HR (95%CI)       |
|--------------------------------|------------------|
| RAD51B                         |                  |
| Lower                          | 1.00 (ref)       |
| Higher                         | 0.68 (0.51~0.90) |
| Gender                         |                  |
| Female                         | 1.00 (ref)       |
| Male                           | 0.82 (0.59~1.14) |
| Age (yrs)                      |                  |
| ≤68                            | 1.00 (ref)       |
| >68                            | 1.23 (0.93~1.63) |
| Recurrence                     |                  |
| No                             | 1.00 (ref)       |
| Yes                            | 1.74 (1.24~2.44) |
| Missing                        | 1.36 (0.97~1.90) |
| Smoke history                  |                  |
| Non-smoker                     | 1.00 (ref)       |
| Reformed-smoker                | 0.38 (0.17~0.89) |
| Current-smoker                 | 0.50 (0.21~1.18) |
| Missing                        | 0.23 (0.05~1.15) |
| Stage                          |                  |
| I                              | 1.00 (ref)       |
| II                             | 1.12 (0.81~1.54) |
| III+IV                         | 1.55 (1.09~2.20) |
| Missing                        | n.r.*            |

n.r.\*=not reached.

and hydrolyze ATP in a DNA-dependent manner [28], which is critical in processing the Holliday junction, a key intermediate in the homologous recombination repair pathway. Besides, evidence demonstrates that RAD51B could interact with RAD51C to form a highly stable heterodimer, facilitating RAD51 to replace RPA from the nucleosome filaments and promoting the DNA strand exchange activity of RAD51-ssDNA filaments [13]. It is noticeable that RAD51C has been proved to be a tumor suppressor [10]. Based on the correlation of structure and biological functions between these two repair genes, there could be a presumption that RAD51B may also function as a non-negligible role in tumorigenesis. Intriguingly, in contrast to our findings on RAD51B, others showed that hyperexpression of RAD51B in a subset of GC (Gastric Cancer) was significantly associated with poor prognosis and resistance to chemotherapy [29]. This apparent

discrepancy may be the result of species differences and/or differences between cell types.

In our research, we are facilitated by TCGA highly credible database, which can effectively collect, select, and analyze human tissues for genomic alterations on a very large scale. We thus combined gene information with clinical data, using statistical methods to draw a substantive conclusion. However, since cut-off values and staining patterns remain poorly defined and intratumoral heterogeneity is present, the therapeutic relevance of these biomarkers remains a matter of debate.

Nevertheless, our results provide statistical evidence for RAD51B as an independent factor affecting the prognosis of NSCLC, especially for the patients with squamous cell carcinoma. It also indicates that RAD51B could be a promising site for targeted therapy. To verify

**Table 5: Cox model survival analysis of clinicopathological parameters in NSCLC patients with adenocarcinoma (n=503)**

| Clinicopathological parameters | HR (95%CI)       |
|--------------------------------|------------------|
| RAD51B                         |                  |
| Lower                          | 1.00 (ref)       |
| Higher                         | 0.78 (0.53~1.16) |
| Gender                         |                  |
| Female                         | 1.00 (ref)       |
| Male                           | 1.06 (0.76~1.48) |
| Age (yrs)                      |                  |
| ≤68                            | 1.00 (ref)       |
| >68                            | 1.47 (1.04~2.07) |
| Recurrence                     |                  |
| No                             | 1.00 (ref)       |
| Yes                            | 2.60 (1.73~3.91) |
| Missing                        | 2.40 (1.60~3.61) |
| Smoke history                  |                  |
| Non-smoker                     | 1.00 (ref)       |
| Reformed-smoker                | 1.09 (0.64~1.87) |
| Current-smoker                 | 0.72 (0.39~1.32) |
| Missing                        | 0.70 (0.34~1.45) |
| Stage                          |                  |
| I                              | 1.00 (ref)       |
| II                             | 2.70 (1.76~4.14) |
| III+IV                         | 4.10 (2.78~6.06) |
| Missing                        | n.r.*            |

n.r.\*=not reached.

this hypothesis, a detailed research of RAD51B in association with its molecular mechanism and clinical trials in NSCLC will be needed. Finally, we hope this research can provide ideas and fundamental theory to support further studies on RAD51B.

## MATERIALS AND METHODS

### Data source

Publicly accessible data from The Cancer Genome Atlas research network (TCGA) was used for determining NSCLC cases (TCGA provisional, 1124 samples) and gene expression (IlluminaHiSeq) of lung cancer, from Jul. 2010 to Feb. 2015, downloaded from the Cancer Genomics Browser (<http://genome-cancer.ucsc.edu>). According to

established selection criteria of clinical case parameters, 1062 samples were available for analysis with valid data for RAD51B expression level, event, recurrence, overall survival time, etc. According to the data's distribution of the RAD51B expression level, we searched for the optimum higher expression cut-off value from  $P_5$  to  $P_{95}$  respectively, after taking account into both  $P$ -value and sample size. As a result, we found the  $P_{70}$  (>6.39) as the optimum cutoff point of RAD51B, which classifies the NSCLC patients significantly after performing the Log-rank test. Thus, we defined patients who carried an RAD51B expression level of >6.39 as the high expression group, with others being the low expression group, resulting in higher and lower expression group samples of 304 and 758, respectively.



## Statistical analysis

We used the Wilcoxon and Kruskal-Wallis rank sum test to test the difference of the expression level of RAD51B between two or more than two groups due to its distribution not following a normal distribution. The overall survival (OS), survival curve, and median survival time were estimated by Kaplan-Meier methods and their difference was compared using the log-rank test. Occurrence of cancer-related death in patients was defined as event failure. The hazard ratio (HR) and its 95% confidence interval (95%CI) of NSCLC for the differentiated death risk and RAD51B expressions were estimated in total subjects or in the stratified groups (adenocarcinoma or squamous cell carcinoma) by the Cox model, after adjustment for the potential factors: recurrence, stage, age, gender and history of smoking. Analyses were performed using SPSS version 23.0 (SPSS Institute Inc. Chicago, IL, USA) with  $P < 0.05$  considered as statistically significant.

## Abbreviations

NSCLC, Non-small-cell lung cancer; HR, Hazard ratio; DSBs, DNA double-strand breaks; OS, Overall survival; CHO, Chinese hamster ovary; HCT116, Human colorectal cancer cell line; RAD, Radiation-repair gene; XRCC, X-ray repair cross-complementing.

## Author contributions

M.Y.W. designed the study, conducted statistical analysis and wrote the manuscript. Z.F.S. conducted statistical analysis and wrote the figures. Z.Y.L. screened the studies and extracted data. L.Y.J. and Y.H.B. reviewed the reliability of the results. Y.P.S. directed, performed statistical analysis and supervised the study. All authors reviewed and approved the final version of the paper.

## ACKNOWLEDGMENTS

This work was supported by the National Natural Science Foundation of Jiangsu Province (No. BK 20151176), the Jiangsu Preventive Medicine Association Project (No. Y2013016) and the Changzhou Technology Science Project (No. CJ 20140042).

We thank Xiaochen Shu for his advice on manuscript preparation and Ian Hunter for article reviewing. We are also sincerely grateful to the TCGA database and Soochow University.

## CONFLICTS OF INTEREST

The authors declare no conflicts of interest.

## REFERENCES

1. Zappa C, Mousa SA. Non-small cell lung cancer: current treatment and future advances. *Transl Lung Cancer Res.* 2016; 5:288-300. <https://doi.org/10.21037/tlcr.2016.06.07>.
2. Kato S, Goodman A, Walavalkar V, Barkauskas DA, Sharabi A, Kurzrock R. Hyperprogressors after Immunotherapy: Analysis of Genomic Alterations Associated with Accelerated Growth Rate. *Clin Cancer Res.* 2017. <https://doi.org/10.1158/1078-0432.CCR-16-3133>.
3. Champiat S, Derclé L, Ammari S, Massard C, Hollebecque A, Postel-Vinay S, Chaput N, Eggermont A, Marabelle A, Soria JC. Hyperprogressive Disease Is a New Pattern of Progression in Cancer Patients Treated by Anti-PD-1/PD-L1. *Clinical Cancer Research.* 2017; 23:1920. <https://doi.org/10.1158/1078-0432.CCR-16-1741>.
4. Ansari J, Shackelford RE, El-Osta H. Epigenetics in non-small cell lung cancer: from basics to therapeutics. *Transl Lung Cancer Res.* 2016; 5:155-71. <https://doi.org/10.21037/tlcr.2016.02.02>.
5. Fang EF, Scheibye-Knudsen M, Chua KF, Mattson MP, Croteau DL, Bohr VA. Nuclear DNA damage signalling to mitochondria in ageing. *Nat Rev Mol Cell Biol.* 2016; 17:308-21. <https://doi.org/10.1038/nrm.2016.14>.
6. Song JQ, Bent AF. Microbial Pathogens Trigger Host DNA Double-Strand Breaks Whose Abundance Is Reduced by Plant Defense Responses. *Plos Pathogens.* 2014; 10. <https://doi.org/10.1371/journal.ppat.1004030>.
7. Liu HL, Zhang HX, Wang XH, Tian QS, Hu ZH, Peng CM, Jiang P, Wang TT, Guo W, Chen YL, Li XZ, Zhang PM, Pei HD. The Deubiquitylating Enzyme USP4 Cooperates with CtIP in DNA Double-Strand Break End Resection. *Cell Reports.* 2015; 13:93-107. <https://doi.org/10.1016/j.celrep.2015.08.056>.
8. Prakash R, Zhang Y, Feng W, Jasin M. Homologous recombination and human health: the roles of BRCA1, BRCA2, and associated proteins. *Cold Spring Harb Perspect Biol.* 2015; 7:a016600. <https://doi.org/10.1101/cshperspect.a016600>.
9. Nagathihalli NS, Nagaraju G. RAD51 as a potential biomarker and therapeutic target for pancreatic cancer. *Biochimica Et Biophysica Acta.* 2011; 1816:209-18. <https://doi.org/10.1016/j.bbcan.2011.07.004>.
10. Kuznetsov SG, Haines DC, Martin BK, Sharan SK. Loss of Rad51c leads to embryonic lethality and modulation of Trp53-dependent tumorigenesis in mice. *Cancer Research.* 2009; 69:863. <https://doi.org/10.1158/0008-5472.CAN-08-3057>.
11. Lee PS, Fang J, Jessop L, Myers T, Raj P, Hu N, Wang C, Taylor PR, Wang J, Khan J. RAD51B Activity and Cell Cycle Regulation in Response to DNA Damage in Breast Cancer Cell Lines. *Breast Cancer Basic & Clinical*

- Research. 2014; 8:135-44. <https://doi.org/10.4137/BCBCR.S17766>.
12. Nowacka-Zawisza M, Wiśnik E, Wasilewski A, Skowrońska M, Forma E, Bryś M, Różański W, Krajewska WM. Polymorphisms of Homologous Recombination RAD51, RAD51B, XRCC2, and XRCC3 Genes and the Risk of Prostate Cancer. *Analytical Cellular Pathology*. 2015; 2015:828646. <https://doi.org/10.1155/2015/828646>.
  13. Lio YC, Mazin AV, Kowalczykowski SC, Chen DJ. Complex formation by the human Rad51B and Rad51C DNA repair proteins and their activities *in vitro*. *Journal of Biological Chemistry*. 2003; 278:2469. <https://doi.org/10.1074/jbc.M211038200>.
  14. Ishida M, Sueda T, Date O, Katsura M, Yoshihara T, Kinomura A, Miyagawa K. Haploinsufficiency of RAD51B causes centrosome fragmentation and aneuploidy in human cells. *Cancer Research*. 2006; 66:6018. <https://doi.org/10.1158/0008-5472.CAN-05-2803>.
  15. Havre PA, Rice MC, Noe M, Kmiec EB. The human REC2/RAD51B gene acts as a DNA damage sensor by inducing G1 delay and hypersensitivity to ultraviolet irradiation. *Cancer Research*. 1998; 58:4733-9.
  16. Scarbrough PM, Weber RP, Iversen ES, Brhane Y, Amos CI, Kraft P, Hung RJ, Sellers TA, Witte JS, Pharaoh P. A Cross-Cancer Genetic Association Analysis of the DNA repair and DNA Damage Signaling Pathways for Lung, Ovary, Prostate, Breast and Colorectal Cancer. *Cancer Epidemiology Biomarkers & Prevention*. 2015; 25. <https://doi.org/10.1158/1055-9965.EPI-15-0649>.
  17. Sliwinski T, Walczak A, Przybyłowska K, Rusin P, Pietruszewska W, Zielinskablizniewska H, Olszewski J, Morawiecsztandera A, Jendrzeczyk S, Mlynarski W. Polymorphisms of the XRCC3 C722T and the RAD51 G135C genes and the risk of head and neck cancer in a Polish population. *Experimental & Molecular Pathology*. 2010; 89:358-66. <https://doi.org/10.1016/j.yexmp.2010.08.005>.
  18. Kayani MA, Khan S, Baig RM, Mahjabeen I. Association of RAD 51 135 G/C, 172 G/T and XRCC3 Thr241Met gene polymorphisms with increased risk of head and neck cancer. *Asian Pacific Journal of Cancer Prevention*. 2014; 15:10457. <https://doi.org/10.7314/apjcp.2014.15.23.10457>.
  19. Yu X, Li Y, Chen SW, Shi Y, Xu F. Differential expression of glypican-3 (GPC3) in lung squamous cell carcinoma and lung adenocarcinoma and its clinical significance. *Genetics & Molecular Research*. 2015; 14:10185. <https://doi.org/10.4238/2015.August.28.2>.
  20. Wibom C, Sjöström S, Henriksson R, Brännström T, Broholm H, Rydén P, Johansen C, Collatzlaier H, Hepworth S, McKinney PA. DNA-repair gene variants are associated with glioblastoma survival. *Acta Oncologica*. 2012; 51:325. <https://doi.org/10.3109/0284186X.2011.616284>.
  21. Orr N, Lemnrau A, Cooke R, Fletcher O, Tomczyk K, Jones M, Johnson N, Lord CJ, Mitsopoulos C, Zvelebil M. Genome-wide association study identifies a common variant in RAD51B associated with male breast cancer risk. *Nature Genetics*. 2012; 44:1182-4. <https://doi.org/10.1038/ng.2417>.
  22. Rieke DT, Ochsenreither S, Klinghammer K, Seiwert TY, Klauschen F, Tinhofer I, Keilholz U. Methylation of RAD51B, XRCC3 and other homologous recombination genes is associated with expression of immune checkpoints and an inflammatory signature in squamous cell carcinoma of the head and neck, lung and cervix. *Oncotarget*. 2016; 7:75379-93. <https://doi.org/10.18632/oncotarget.12211>.
  23. Shu Z, Smith S, Wang L, Rice MC, Kmiec EB. Disruption of muREC2/RAD51L1 in Mice Results in Early Embryonic Lethality Which Can Be Partially Rescued in a p53<sup>-/-</sup> Background. *Molecular & Cellular Biology*. 1999; 19:8686-93. <https://doi.org/10.1128/mcb.19.12.8686>.
  24. Nowacka-Zawisza M, Wisnik E, Wasilewski A, Skowronska M, Forma E, Brys M, Rozanski W, Krajewska WM. Polymorphisms of homologous recombination RAD51, RAD51B, XRCC2, and XRCC3 genes and the risk of prostate cancer. *Anal Cell Pathol (Amst)*. 2015; 2015:828646. <https://doi.org/10.1155/2015/828646>.
  25. Kostyrko K, Bosshard S, Urban Z, Mermod N. A role for homologous recombination proteins in cell cycle regulation. *Cell Cycle*. 2015; 14:2853-61. <https://doi.org/10.1080/15384101.2015.1049784>.
  26. Prakash R, Zhang Y, Feng W, Jasin M. Homologous recombination and human health: the roles of BRCA1, BRCA2 and associated proteins. *Cold Spring Harbor Perspectives in Biology*. 2015; 7:a016600. <https://doi.org/10.1101/cshperspect.a016600>.
  27. Takata M, Sasaki MS, Sonoda E, Fukushima T, Morrison C, Albala JS, Swagemakers SM, Kanaar R, Thompson LH, Takeda S. The Rad51 paralog Rad51B promotes homologous recombinational repair. *Molecular & Cellular Biology*. 2000; 20:6476. <https://doi.org/10.1128/mcb.20.17.6476-6482.2000>.
  28. Yokoyama H, Kurumizaka H, Ikawa S, Yokoyama S, Shibata T. Holliday junction binding activity of the human Rad51B protein. *J Biol Chem*. 2003; 278:2767-72. <https://doi.org/10.1074/jbc.M210899200>.
  29. Cheng Y, Yang B, Xi Y, Chen X. RAD51B as a potential biomarker for early detection and poor prognostic evaluation contributes to tumorigenesis of gastric cancer. *Tumour Biology*. 2016:1-10. <https://doi.org/10.1007/s13277-016-5340-3>.
